# Supplementary material
Source: PubMed Central journal article supplement (PMC6727269)
Supplement: ASN.2018111160SupplementaryData.pdf [file ASN.2018111160SupplementaryData.pdf]

## **Chiusa et al. Supplementary Information**

### **Supplementary Table of Content**

**Supplementary Table 1**

**Supplementary Table 2**

**Supplementary Figure 1**

**Supplementary Figure 2**

**Supplementary Figure 3**

**Supplementary Table 1.** List of primary antibodies used for Western blot

| <b>Antibody</b>   | <b>Vendor</b>            | <b>Catalog #</b>     |
|-------------------|--------------------------|----------------------|
| $\beta$ -actin    | Cell Signaling           | 4970                 |
| DDR1              | Santa Cruz Biotechnology | sc-532               |
| pY792-DDR1        | Cell Signaling           | 5174                 |
| pY513-DDR1        | Cell Signaling           | 14531                |
| GAPDH             | Cell Signaling           | 5174                 |
| GFP               | Roche                    | 11814460001          |
| HDAC2             | Santa Cruz Biotechnology | sc-6296              |
| histone H3        | Cell Signaling           | 3638                 |
| NMHC-IIA          | Santa Cruz Biotechnology | sc-98978 or sc-47199 |
| PARP1             | Cell Signaling           | 9532                 |
| RBBP4             | Abcam                    | ab1765               |
| SEC61 $\beta$     | Cell Signaling           | 14648                |
| $\alpha$ -tubulin | Santa Cruz Biotechnology | sc-8035              |
|                   |                          |                      |
|                   |                          |                      |

**Supplementary Table 2.** Mass spectrometry identification of some of the immunoprecipitated DDR1-interacting proteins from HEK-DDR1-GFP expressing cells treated with either vehicle (acetic acid) or collagen I.

| DDR1-interacting candidate | Spectral Counts <sup>1</sup> |            | Group assignment        |
|----------------------------|------------------------------|------------|-------------------------|
|                            | Vehicle                      | Collagen I |                         |
| ACTBL (actin $\beta$ like) | 0                            | 8          | Collagen I <sup>2</sup> |
| IPO5 (importin-5)          | 0                            | 2          | Collagen I              |
| RBBP4                      | 0                            | 2          | Collagen I              |
| SC61B                      | 0                            | 2          | Collagen I              |
|                            |                              |            |                         |
| DDR1                       | 296                          | 264        | Common <sup>3</sup>     |
| ACTB ( $\beta$ -actin)     | 26                           | 27         | Common                  |
| KPNB1 (importin- $\beta$ ) | 25                           | 16         | Common                  |
| CFL1 (cofilin 1)           | 10                           | 13         | Common                  |
| MYH9 (NMHCII-A)            | 2                            | 4          | Common                  |

<sup>1</sup> Total number of filtered spectra for all identified peptides in each protein group

<sup>2</sup> Proteins uniquely present in DDR1 immunoprecipitates of collagen I-treated cells

<sup>3</sup> Proteins present in DDR1 immunoprecipitates from both vehicle- and collagen I-treated cells

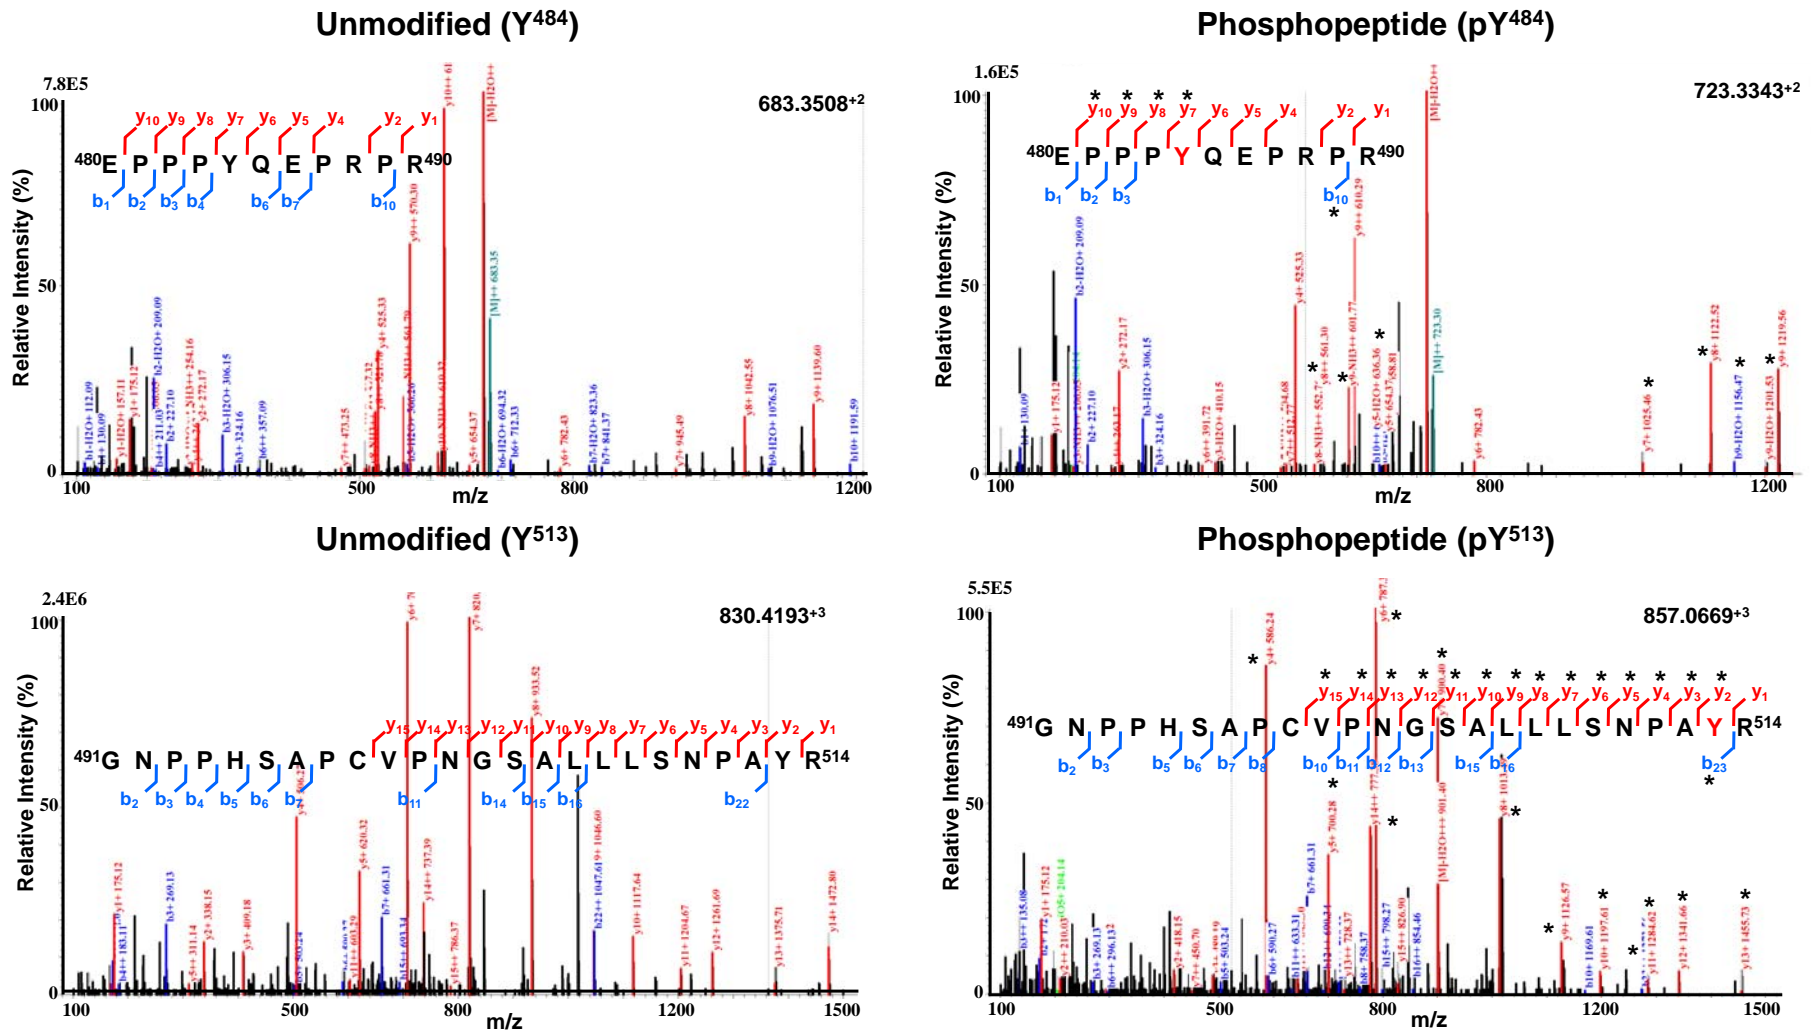

**Supplementary Figure 1**

Mass spectrometry identification of DDR1 phosphotyrosine peptides in collagen I-treated HEK-DDR1-GFP cells. Peptide spectrum matches (PSMs) of unmodified and phosphorylated peptides (Y<sup>484</sup> and Y<sup>513</sup>) from human DDR1. The b-ion (blue) and y-ion (red) series in each PSM were annotated using pLABEL v2.4.0.5 (Wang L.H. et al., Rapid Commun Mass Spectrom 21, 2985-2991, 2007). The asterisk (\*) indicates fragments containing the phosphorylated tyrosine. Phosphorylated tyrosine residues are highlighted in red within the peptide sequence shown above each MS/MS spectrum.

Chiusa M. et al., Supplementary Figure 1

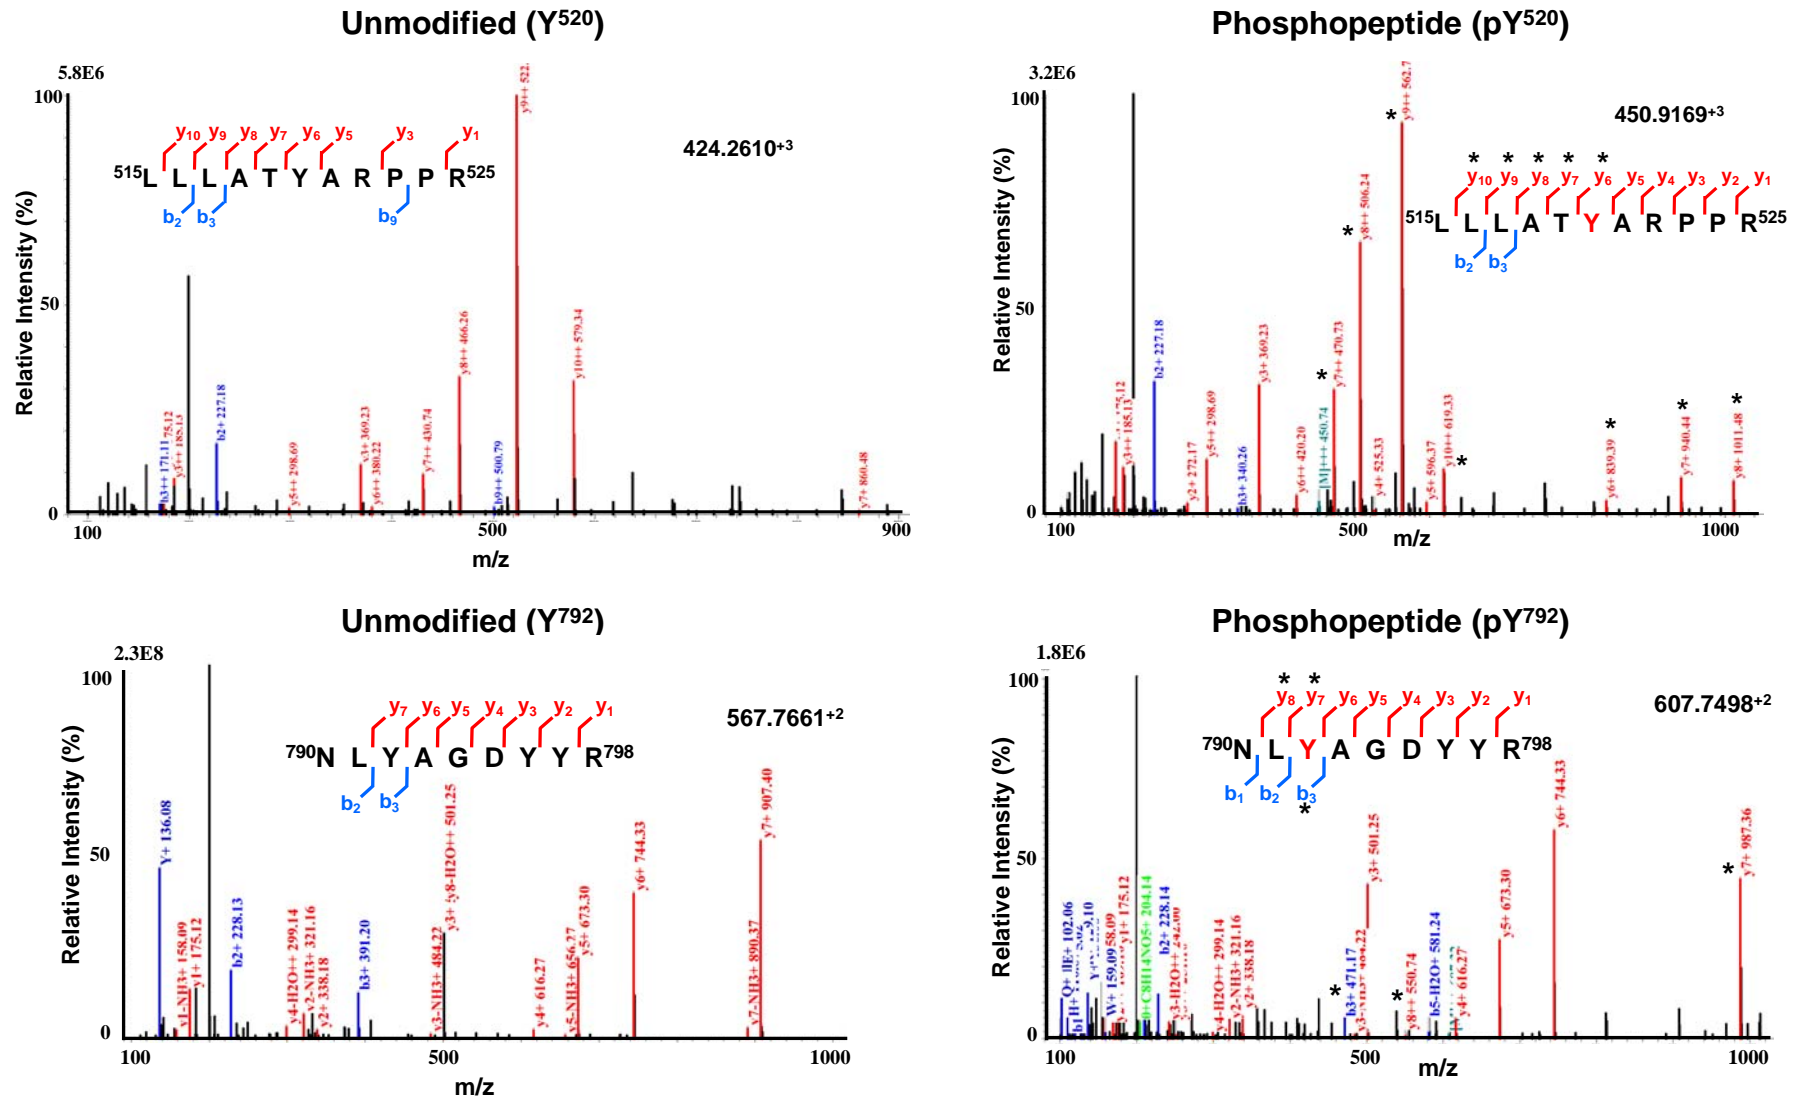

**Supplementary Figure 1**

Mass spectrometry identification of DDR1 phosphotyrosine peptides in collagen I-treated HEK-DDR1-GFP cells. Peptide spectrum matches (PSMs) of unmodified and phosphorylated peptides (Y<sup>520</sup> and Y<sup>792</sup>) from human DDR1. The b-ion (blue) and y-ion (red) series in each PSM were annotated using pLABEL v2.4.0.5 (Wang L.H. et al., Rapid Commun Mass Spectrom 21, 2985-2991, 2007). The asterisk (\*) indicates fragments containing the phosphorylated tyrosine. Phosphorylated tyrosine residues are highlighted in red within the peptide sequence shown above each MS/MS spectrum.

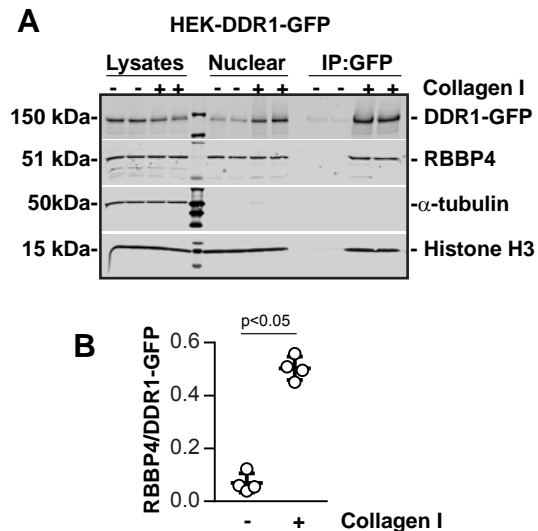

### Supplementary Figure 2

Nuclear DDR1 forms a complex with RBBP4. **(A)** Serum-starved HEK-DDR1-GFP cells were treated with acetic acid (20 mM) or collagen I (50  $\mu$ g/ml) for 1 hour. Nuclear lysates (200  $\mu$ g) were immunoprecipitated with GFP-TRAP beads and the immunoprecipitates were analyzed by Western blot for levels of DDR1-GFP and RBBP4.  $\alpha$ -tubulin and histone H3 were used to evaluate purity of the fractions. Histone H3 co-immunoprecipitated with DDR1-GFP and RBBP4 only in cells stimulated with collagen I. Lysates and nuclear represent total and nuclear (both 20  $\mu$ g) proteins analyzed for total levels of DDR1-GFP, RBBP4,  $\alpha$ -tubulin or histone H3. **(B)** DDR1-GFP and RBBP4 bands were quantified by densitometry. Values represent RBBP4/DDR1-GFP ratio and are the mean  $\pm$  SD of 2 experiments performed in duplicate.

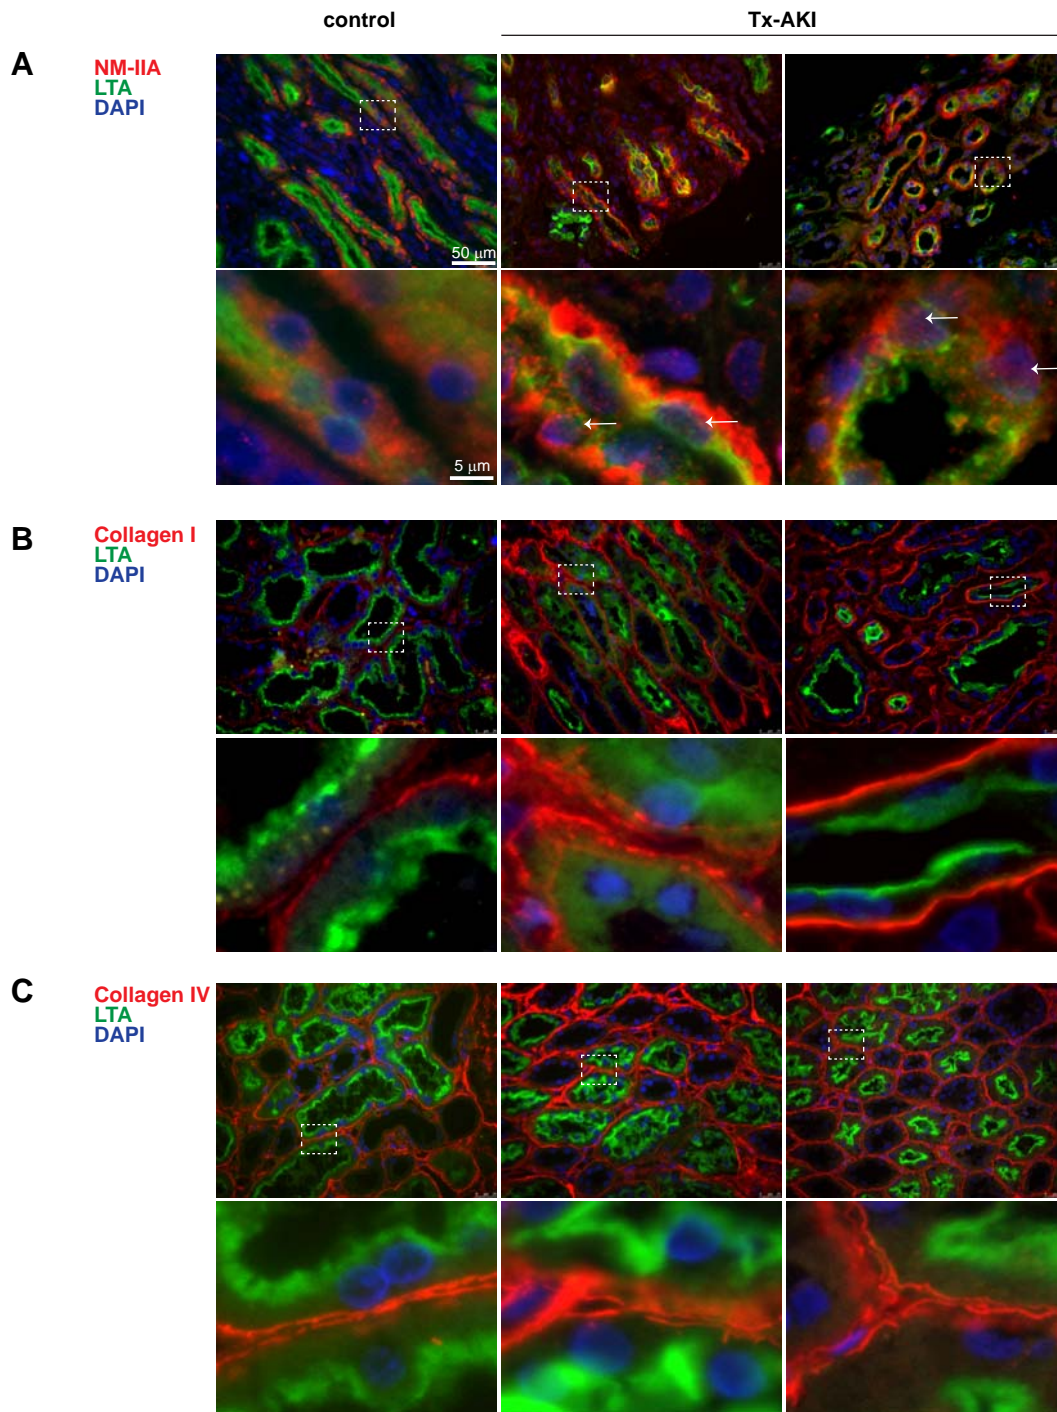

### Supplementary Figure 3

Analysis of collagens and NMHC-IIA localization in injured human kidneys. Paraffin kidney sections from control or 2 patients with Tx-AKI were stained with NM-IIA antibody and LTA (**A**), collagen I antibody and LTA (**B**), or collagen IV antibody and LTA (**C**) and analyzed by confocal microscopy. Expression of NM IIA becomes evident in the nuclei of injured proximal tubules (arrow). Note increased expression of both collagen IV and collagen I around injured proximal tubules.
